# Supplementary material for: Bis-cyclooctatetraene tripalladium sandwich complexes
Source: Royal Society of Chemistry journal article supplement (doi:10.1039/c3cc47515h), 2013-11-29
Supplement: c3cc47515h.pdf [file c3cc47515h.pdf]

## Supplementary Materials

### Bis-cyclooctatetraene Tripalladium Sandwich Complexes

Tetsuro Murahashi,\* Seita Kimura, Kohei Takase, Tomohito Uemura, Sensuke Ogoshi, and  
Koji Yamamoto

*Research Center of Integrative Molecular Systems (CIMoS), Institute for Molecular Science,  
National Institutes of Natural Sciences  
Department of Structural Molecular Science, The Graduate University for Advanced Studies  
PRESTO, Japan Science and Technology Agency  
Myodaiji, Okazaki, Aichi, 444-8787, Japan  
Department of Applied Chemistry, Graduate School of Engineering, Osaka University  
Suita, Osaka, 565-0871, Japan*

## Experimental Section

**General Consideration.** All manipulations were conducted under a nitrogen atmosphere using standard Schlenk or drybox techniques.  $^1\text{H}$ ,  $^{13}\text{C}\{^1\text{H}\}$  NMR spectra were recorded on 400 MHz (JEOL GSX-400, Bruker DPX-400), 500 MHz (JEOL JNM-A500), and 600 MHz (Varian Unity-Inova 600) instruments. The chemical shifts were referenced to the residual resonances of deuterated solvents. Elemental analyses were performed at the Instrument Center, Institute for Molecular Science, or the Analytical Center, Faculty of Engineering, Osaka University. ESI-MS analyses were performed by Bruker micrOTOF ESI-TOF. X-ray crystal data were collected by Rigaku RAXIS-RAPID Imaging Plate diffractometer. Unless specified, all reagents were purchased from commercial suppliers and used without purification. Nitromethane, diethyl ether, dichloromethane, benzene, acetonitrile,  $\text{CD}_3\text{NO}_2$ , and  $\text{CD}_2\text{Cl}_2$  were purified according to the standard procedures.  $[\text{Pd}_2(\text{CH}_3\text{CN})_6][\text{BF}_4]_2$ <sup>1</sup> and  $\text{Pd}_2(\text{dba})_3$ <sup>2</sup> were prepared according to the literature.

**Synthesis of  $[\text{Pd}_3(\mu_3\text{-C}_8\text{H}_8)_2(\text{CH}_3\text{CN})][\text{BF}_4]_2$  (**1-CH<sub>3</sub>CN**):** To a solution of  $\text{Pd}_2(\text{dba})_3$  (200 mg, 0.193 mmol) in  $\text{CH}_2\text{Cl}_2$  was added cyclooctatetraene (131  $\mu\text{L}$ , 1.16 mmol) and  $[\text{Pd}_2(\text{CH}_3\text{CN})_6][\text{BF}_4]_2$  (244 mg, 0.386 mmol). After stirring at room temperature for 1h, the resultant brown precipitate was collected and washed with  $\text{CH}_2\text{Cl}_2$ . The crude product was then dissolved in  $\text{CH}_3\text{NO}_2$ , and  $\text{CH}_3\text{CN}$  (61  $\mu\text{L}$ , 1.16 mmol) was added. After stirring for 5 min at room temperature, the mixture was filtered, and to the filtrate was added  $\text{Et}_2\text{O}$  to afford a dark brown powder of **1-CH<sub>3</sub>CN** (221 mg, 77% yield).  $^1\text{H}$  NMR (400 MHz,  $\text{CD}_3\text{NO}_2$ , 25 °C):  $\delta$  5.43 (16H, s,  $\text{H}_1$ ), 2.43 (3H, s,  $\text{H}_2$ ).  $^{13}\text{C}\{^1\text{H}\}$  NMR (100.6 MHz,  $\text{CD}_3\text{NO}_2$ , 25 °C):  $\delta$  83.7 (s,  $\text{C}_1$ ), 3.1 (s,  $\text{C}_2$ ). An ESI-MS spectrum is shown in Figure S1.

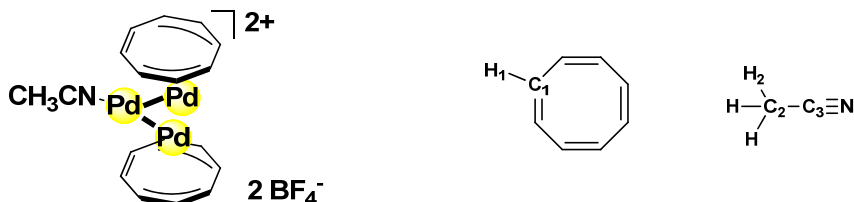

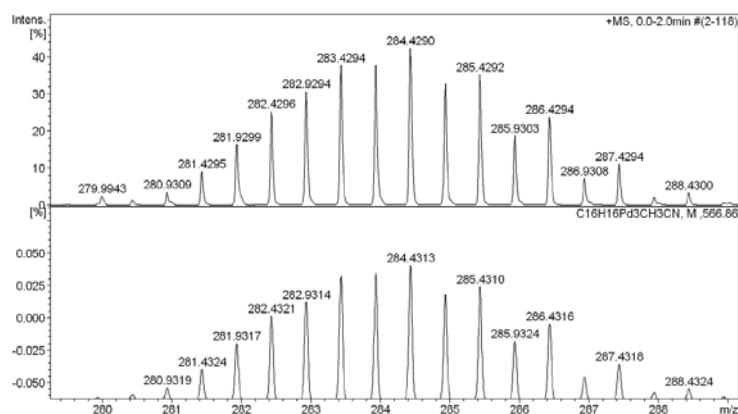

**Figure S1.** Experimental (top) and calculated (bottom) ESI(+)-mass spectra of  $[\text{Pd}_3(\mu_3\text{-cyclooctatetraene})_2(\text{CH}_3\text{CN})][\text{BF}_4]_2$  (**1-CH<sub>3</sub>CN**).

**Synthesis of  $[\text{Pd}_3(\mu_3\text{-C}_8\text{H}_8)_2(\text{PPh}_3)][\text{BF}_4]_2$  (**1-PPh<sub>3</sub>**):** To a  $\text{CH}_3\text{NO}_2$  solution of **1-CH<sub>3</sub>CN** (100 mg, 0.135 mmol) was added  $\text{PPh}_3$  (35.4 mg, 0.135 mmol), and the mixture was stirred for 5 min. The reaction mixture was filtered, and the filtrate was concentrated in vacuo. Addition of  $\text{Et}_2\text{O}$  gave the dark purple precipitate. Recrystallization from  $\text{CH}_3\text{NO}_2$ /benzene gave **1-PPh<sub>3</sub>** (85 mg, 66% yield).  $^1\text{H}$  NMR (400 MHz,  $\text{CD}_3\text{NO}_2$ , 25 °C):  $\delta$  7.80-7.75 (15H, m,  $\text{PPh}_3$ ), 5.27 (16H, s,  $\text{H}_1$ ).  $^{13}\text{C}\{^1\text{H}\}$  NMR (100.6 MHz,  $\text{CD}_3\text{NO}_2$ , 25 °C):  $\delta$  135.8-131.1 ( $\text{PPh}_3$ ), 81.8 (s,  $\text{C}_1$ ).  $^{31}\text{P}\{^1\text{H}\}$  NMR (162 MHz,  $\text{CD}_3\text{NO}_2$ , 25 °C):  $\delta$  29.9. An ESI-MS spectrum is shown in Figure S2. Anal. Calcd. for  $\text{C}_{34}\text{H}_{31}\text{B}_2\text{F}_8\text{P}_1\text{Pd}_3 \cdot \text{CH}_3\text{NO}_2$ : C, 41.03; H, 3.35; N, 1.37. Found: C, 40.54; H, 3.41; N, 0.74.

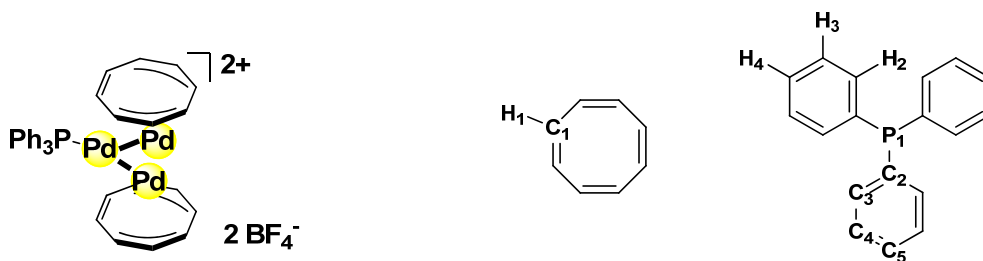

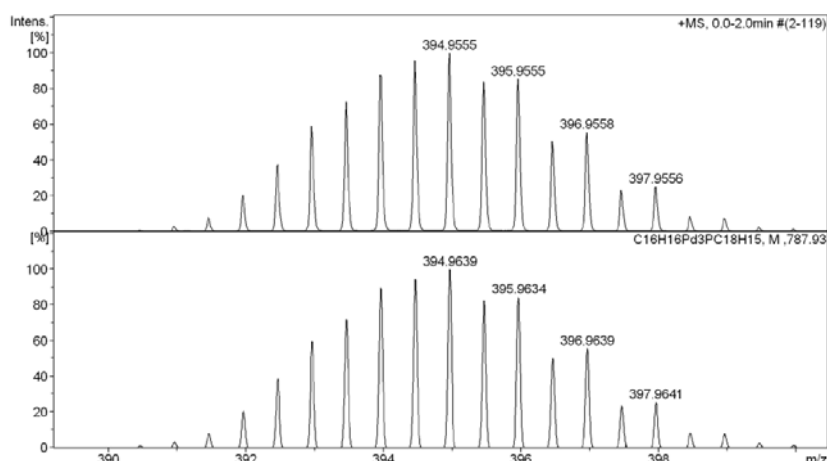

**Figure S2.** Experimental (top) and calculated (bottom) ESI(+)-mass spectra of  $[\text{Pd}_3(\mu_3\text{-cyclooctatetraene})_2(\text{PPh}_3)][\text{BF}_4]_2$  (**1-PPh<sub>3</sub>**).

**Synthesis of  $[\text{Pd}_3(\mu_3\text{-C}_8\text{H}_8)_2(\text{PCy}_3)][\text{BF}_4]_2$  (**1-PCy<sub>3</sub>**):** To a  $\text{CH}_3\text{NO}_2$  solution of **1-CH<sub>3</sub>CN** (107.5 mg, 0.145 mmol) was added  $\text{PCy}_3$  (40.6 mg, 0.145 mmol), and the mixture was stirred for 1 h. The reaction mixture was filtered, and the filtrate was concentrated in vacuo. Addition of  $\text{Et}_2\text{O}$  gave the dark purple precipitate. Recrystallization from  $\text{CH}_2\text{Cl}_2$ /hexane gave **1-PCy<sub>3</sub>** (88.1 mg, 62% yield).  $^1\text{H}$  NMR (400 MHz,  $\text{CD}_3\text{NO}_2$ , 25 °C):  $\delta$  5.43 (16H, s,  $\text{H}_1$ ), 2.49 (3H, m,  $\text{H}_2$ ), 2.08 (6H, m,  $\text{H}_3$  or  $\text{H}_4$ ), 1.91 (6H, m,  $\text{H}_3$  or  $\text{H}_4$ ), 1.79 (3H, m,  $\text{H}_5$ ), 1.48-1.68 (12H, m,  $\text{H}_3$ ,  $\text{H}_4$ ), 1.35 (3H, m,  $\text{H}_5$ ).  $^{13}\text{C}\{^1\text{H}\}$  NMR (100.5 MHz,  $\text{CD}_3\text{NO}_2$ , 25 °C):  $\delta$  80.4 (s,  $\text{C}_1$ ), 36.0 (d,  $J = 14$  Hz,  $\text{C}_2$ ), 32.1 (s,  $\text{C}_3$  or  $\text{C}_4$ ) 28.6 (d,  $J = 10$  Hz,  $\text{C}_3$  or  $\text{C}_4$ ) 27.3 (s,  $\text{C}_5$ ).  $^{31}\text{P}\{^1\text{H}\}$  NMR (160.3 MHz,  $\text{CD}_3\text{NO}_2$ , 25 °C):  $\delta$  43.6 (s,  $\text{P}_1$ ). An ESI-MS spectrum is shown in Figure S3. Anal. Calcd. For.  $\text{C}_{34}\text{H}_{49}\text{B}_2\text{F}_8\text{PPd}_3 \cdot 0.5\text{CH}_2\text{Cl}_2$ : C, 40.46; H, 4.92. Found: C, 40.32; H, 5.26.

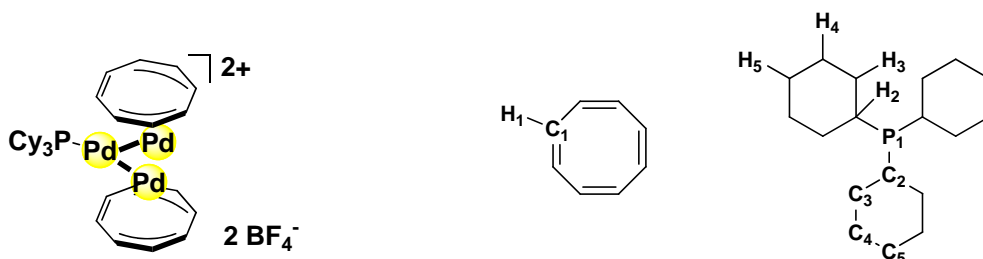

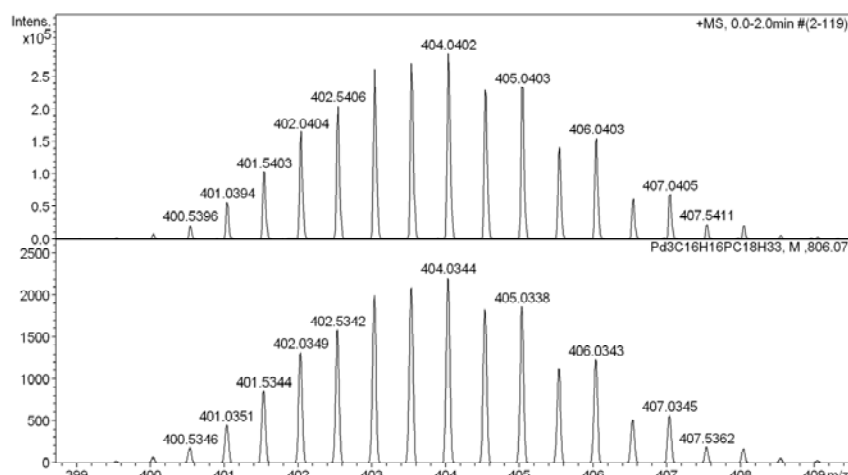

**Figure S3.** Experimental (top) and calculated (bottom) ESI(+)-mass spectra of  $[\text{Pd}_3(\mu_3\text{-cyclooctatetraene})_2(\text{PCy}_3)][\text{BF}_4]_2$  (**1-PCy<sub>3</sub>**).

**Synthesis of  $[\text{Pd}_2(\mu\text{-C}_8\text{H}_8)(\text{PPh}_3)_4][\text{BF}_4]_2$  (**4-PPh<sub>3</sub>**):** The complex **4-PPh<sub>3</sub>** was isolated by the following method. To a  $\text{CH}_3\text{CN}_3$  solution of  $[\text{Pd}_2(\mu\text{-}\eta^3\text{:}\eta^3\text{-C}_8\text{H}_8)(\text{CH}_3\text{CN})_4][\text{BF}_4]_2$  (88.5 mg, 0.131 mmol) was added  $\text{PPh}_3$  (137.0 mg, 0.522 mmol), and the mixture was stirred for 1 h. The reaction mixture was filtered, and the filtrate was concentrated in vacuo. Addition of  $\text{Et}_2\text{O}$  gave the orange precipitate. Recrystallization from  $\text{CH}_3\text{CN}/\text{ether}$  gave  $[\text{Pd}_2(\mu\text{-}\eta^3\text{:}\eta^3\text{-C}_8\text{H}_8)(\text{PPh}_3)_4][\text{BF}_4]_2$  (126.3 mg, 63% yield).  $^1\text{H}$  NMR (400 MHz,  $\text{CD}_3\text{NO}_2$ , 25 °C):  $\delta$  7.47 (12H, t,  $J = 7$  Hz,  $\text{H}_4$ ),  $\delta$  7.34 (24H, dd,  $J = 7$  Hz,  $J = 7$  Hz,  $\text{H}_3$ ),  $\delta$  7.20 (24H, m,  $\text{H}_2$ ),  $\delta$  4.54 (8H, s,  $\text{H}_1$ ).  $^{13}\text{C}\{^1\text{H}\}$  NMR (100.5 MHz,  $\text{CD}_3\text{NO}_2$ , 25 °C):  $\delta$  134.9 (s,  $\text{C}_5$ ), 132.8 (s,  $\text{C}_3$ ), 131.2 (t,  $J = 24$  Hz,  $\text{C}_2$ ) 130.5 (s,  $\text{C}_4$ ) 100.4 (s,  $\text{C}_1$ ).  $^{31}\text{P}\{^1\text{H}\}$  NMR (160.3 MHz,  $\text{CD}_3\text{NO}_2$ , 25 °C):  $\delta$  25.2 (s,  $\text{P}_1$ ). An ESI-MS spectrum is shown in Figure S4. Anal. Calcd. For.  $\text{C}_{80}\text{H}_{68}\text{B}_2\text{F}_8\text{P}_4\text{Pd}_2$ : C, 62.40; H, 4.83. Found: C, 62.05; H, 4.45.

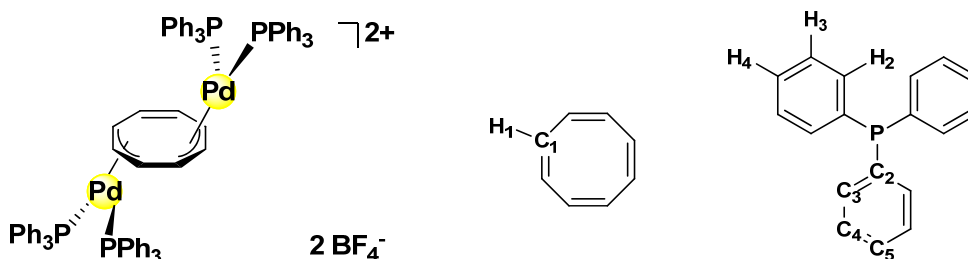

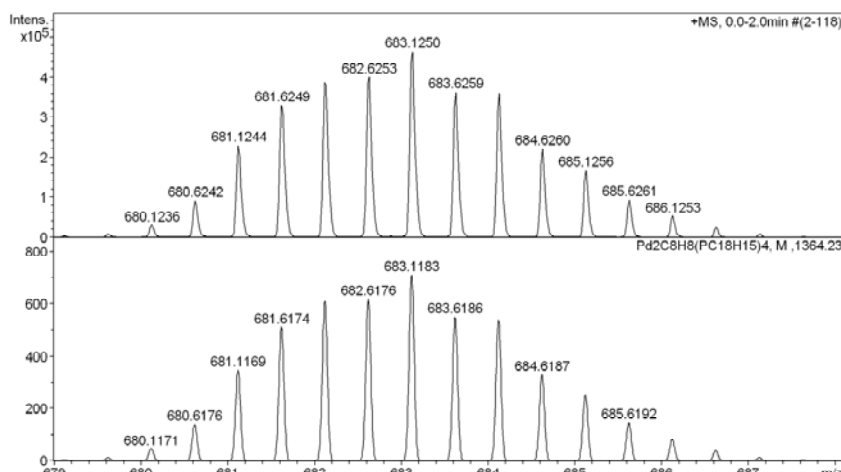

**Figure S4.** Experimental (top) and calculated (bottom) ESI(+)-mass spectra of  $[\text{Pd}_2(\mu\text{-}\eta^3\text{:}\eta^3\text{-cyclooctatetraene})(\text{PPh}_3)_4][\text{BF}_4]_2$  (**4-PPh<sub>3</sub>**).

### X-ray Crystallographic Data

Crystal data for **1-H<sub>2</sub>O·H<sub>2</sub>O·C<sub>6</sub>H<sub>6</sub>**:  $\text{C}_{22}\text{H}_{26}\text{B}_2\text{F}_8\text{O}_2\text{Pd}_2$ ,  $M_r = 815.25$ , monoclinic, space group  $P2_1/n$  (no. 14),  $a = 10.0392(6)$ ,  $b = 16.352(1)$ ,  $c = 14.6824(8)$  Å,  $\beta = 93.420(2)^\circ$ ,  $V = 2405.9(3)$  Å<sup>3</sup>,  $Z = 4$ ,  $F(000) = 1576$ ,  $D_c = 2.251$  g cm<sup>-3</sup>,  $\mu(\text{MoK}\alpha) = 23.025$  cm<sup>-1</sup>,  $T = 123$  K, 22510 reflections collected, 5472 unique ( $R_{\text{int}} = 0.0545$ ), 334 variables refined with 4221 reflections with  $I > 3\sigma(I)$  to  $R = 0.054$ . CCDC 904367.

For the crystal structure of **1-H<sub>2</sub>O**, a relatively large residual electron density was observed at (0.93344, 0.56154, 0.24500), which is located closely to the heavy metal atom (Pd1).

Crystal data for **4-PPh<sub>3</sub>**:  $\text{C}_{80}\text{H}_{68}\text{P}_4\text{B}_2\text{F}_8\text{O}_2\text{Pd}_2$ ,  $M_r = 1539.64$ , monoclinic, space group  $C2/c$  (no. 15),  $a = 25.3856(12)$ ,  $b = 24.7751(10)$ ,  $c = 11.8833(6)$  Å,  $\beta = 93.6780(10)^\circ$ ,  $V = 7458.4(6)$  Å<sup>3</sup>,  $Z = 4$ ,  $F(000) = 3296$ ,  $D_c = 1.447$  g cm<sup>-3</sup>,  $\mu(\text{MoK}\alpha) = 7.03$  cm<sup>-1</sup>,  $T = 123$  K, 36530 reflections collected, 8540 unique ( $R_{\text{int}} = 0.0764$ ), 408 variables refined with 5150 reflections with  $I > 2\sigma(I)$  to  $R = 0.073$ . CCDC 962478.

For the crystal structure of **4-PPh<sub>3</sub>**, four methylene chloride molecules in the unit cell are disordered. The contribution to the scattering arising from the presence of disordered molecules in the crystals was removed by use of the utility SQUEEZE in the

PLATON software package.<sup>3</sup> Additional details on PLATON/SQUEEZE can be found in the CIF of complex **4-PPh<sub>3</sub>**.

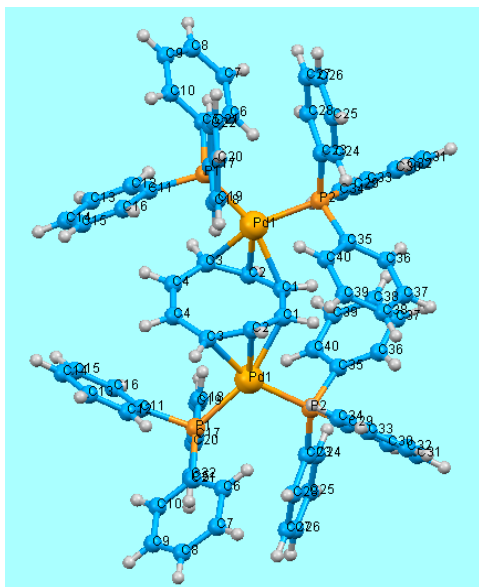

**Figure S5.** A ball and stick drawing of **4-PPh<sub>3</sub>** (BF<sub>4</sub> anions were omitted). For the duplicate atom labels, one set of the atom labels are at (1-x, y, 1/2-z).

## References

- 1 T. Murahashi, T. Nagai, T. Okuno, T. Matsutani, H. Kurosawa, *Chem. Commun.* **2000**, 1689.
- 2 H. Ukai, H. Kawazura, Y. Ishii, *J. Organomet. Chem.* 1974, **65**, 253.
- 3 A. L. Spec, *Acta Cryst.* 2009, **D65**, 148.
